# Supplementary material
Source: PubMed Central journal article supplement (PMC4227305)
Supplement: pr5006394_si_001.pdf [file pr5006394_si_001.pdf]

## Supplementary File 2:

### Differential Cysteine Labelling and Global Label-Free Quantification Reveals an Altered Metabolic State in Skeletal Muscle Aging.

**Brian McDonagh<sup>1,3</sup>, Giorgos K. Sakellariou<sup>1</sup>, Neil T. Smith<sup>1</sup>, Philip Brownridge<sup>2</sup> and Malcolm J. Jackson<sup>1</sup>**

<sup>1</sup>MRC-Arthritis Research UK Centre for Integrated Research into Musculoskeletal Aging (CIMA), Skeletal Muscle Pathophysiology Research Group, Institute of Aging and Chronic Disease, <sup>2</sup>Protein Function Group, Institute of Integrative Biology, University of Liverpool, Liverpool L69 3GA, UK.

## MS Data Analysis and Search Parameters

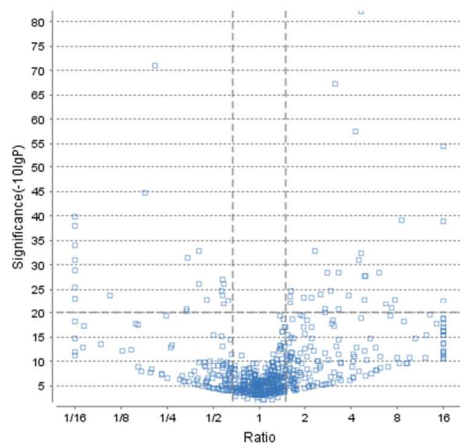

Figure 1. Volcano plot for proteins.

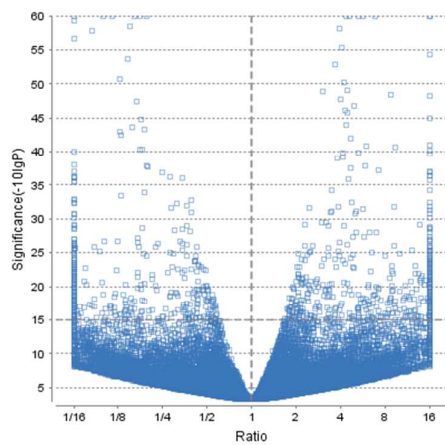

Figure 2. Volcano plot for peptides

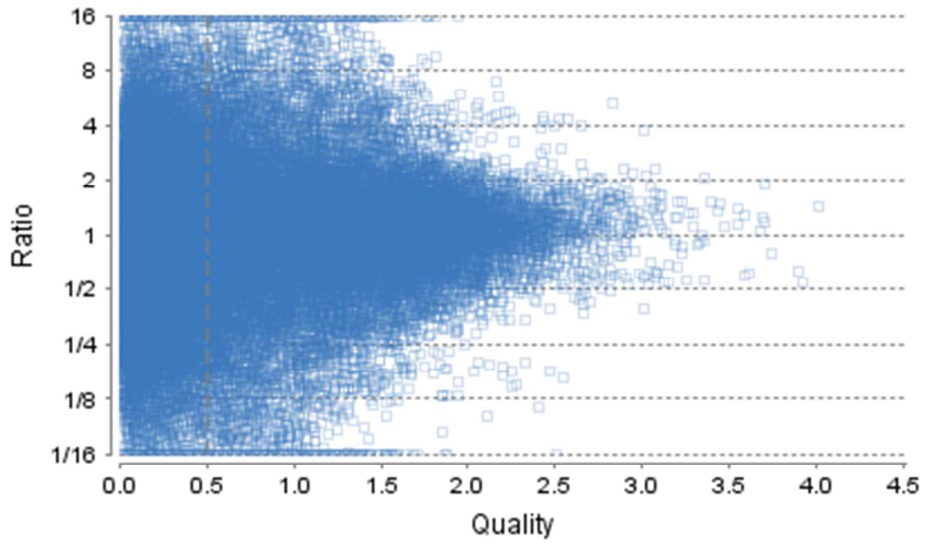

Figure 3. The distribution of feature vector ratio by quality.

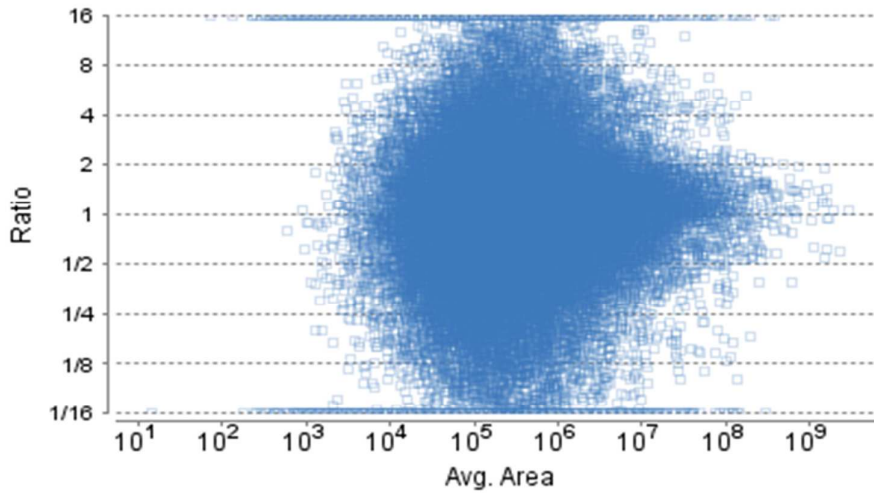

Figure 4. The distribution of feature vector ratio by intensity.

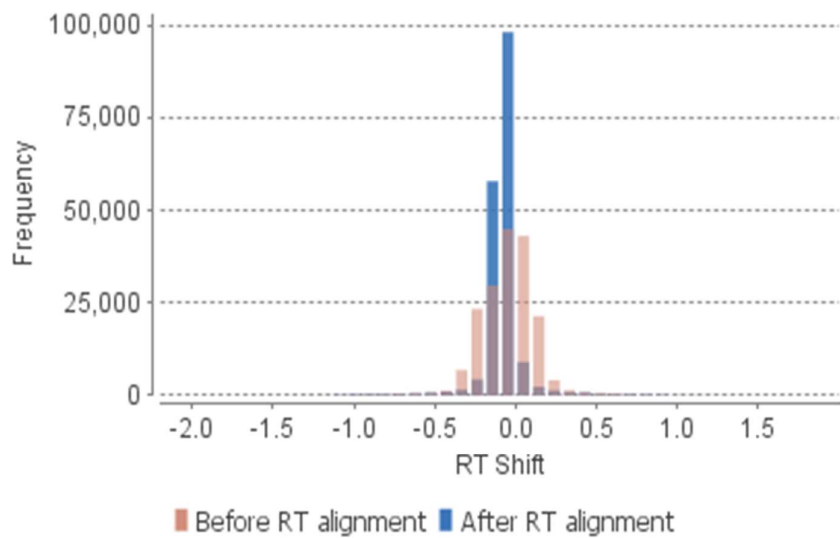

Figure 5. Retention time shift distribution

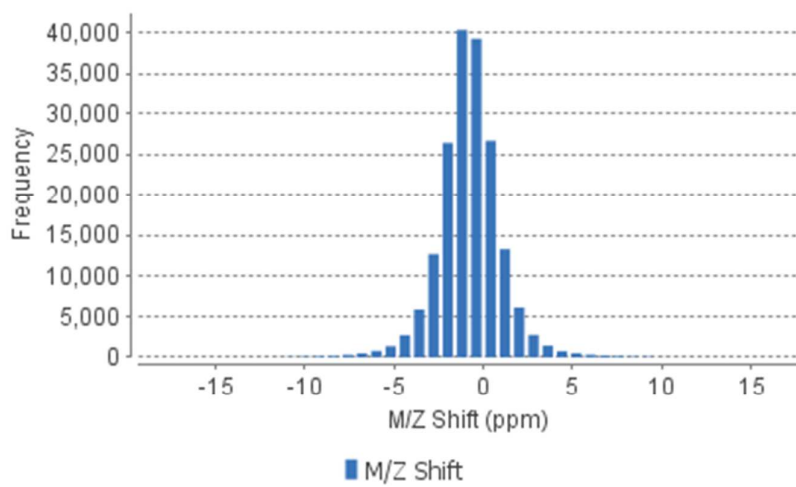

Figure 6. M/Z Shift Distribution

**Table 1.** Result filtration parameters.

|                           |            |
|---------------------------|------------|
| Retention time            | $\geq 0$   |
| Retention time            | $\leq 110$ |
| Feature fold change       | $\geq 1$   |
| Quality                   | $\geq 0.5$ |
| Avg. Area                 | $\geq 0E0$ |
| Charge                    | $\geq 2$   |
| Charge                    | $\leq 5$   |
| Confident sample number   | $\geq 1$   |
| With peptide ID           | true       |
| Normalization             | Use TIC    |
| Protein significance      | $\geq 20$  |
| Protein fold change       | $\geq 1.5$ |
| Confident unique supports | $\geq 1$   |

**Table 2.** Statistics of filtered result.

|                         |      |
|-------------------------|------|
| Features                | 2194 |
| Features with ID        | 1735 |
| Feature vectors         | 293  |
| Feature vectors with ID | 293  |
| Protein groups          | 50   |

**Table 3.** Search Parameters

Quantification type: Label free quantification  
Mass Error Tolerance: 10.0 ppm  
Retention Time Shift Tolerance: 1.0 min  
Dependent on PID: 24,25  
FDR Threshold: 1%  
Samples: 9 samples in 2 groups  
: Adult\_1 Adult\_2 Adult\_3 Adult\_4  
: Adult\_5 Aged\_1 Aged\_2 Aged\_3  
: Aged\_4  
Reference Sample: Aged\_2 (auto detected)  
Training Samples: Adult\_3, Adult\_5 (auto detected)
